# Supplementary material
Source: MDPI journal article supplement (https://www.mdpi.com/2673-2688/3/1/6)

# PRISMA FLOW DIAGRAM

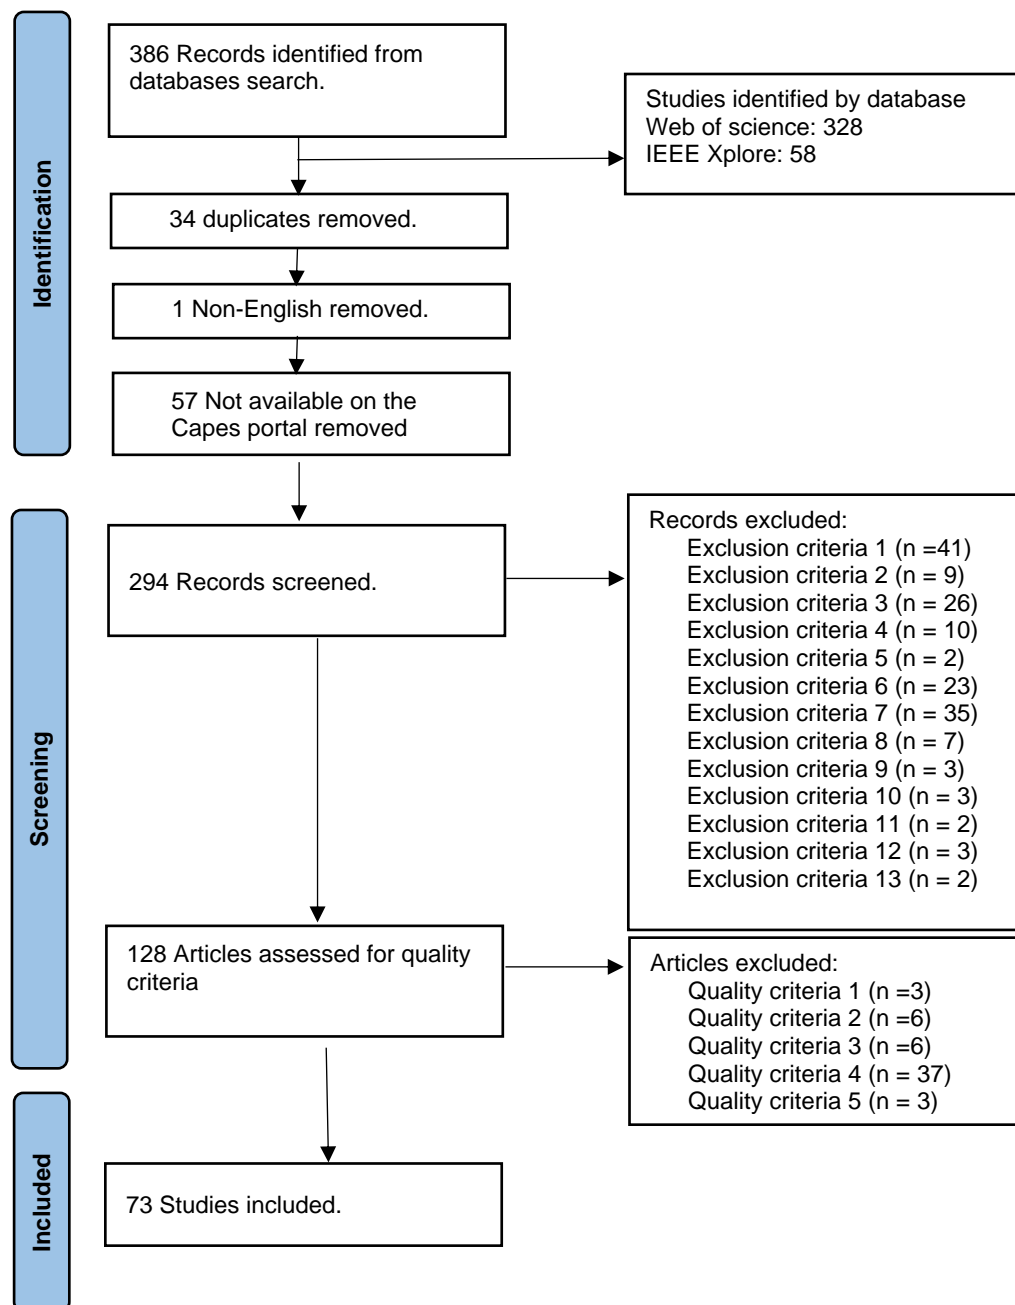

Supplement: s1 [file s1]
